# Supplementary material
Source: PubMed Central journal article supplement (PMC4014352)
Supplement: NIHMS574272-supplement-01.pdf [file NIHMS574272-supplement-01.pdf]

|           |                                  |                                                                                                    |     |
|-----------|----------------------------------|----------------------------------------------------------------------------------------------------|-----|
| <b>MM</b> | WES: 16<br>WGS: 23<br>WES/WGS: 1 | <i>DIS3#</i> , <i>FAM46C</i> , <i>LRRK2</i> , <i>BRAF</i> •†, <i>IRF4</i> †, 11 NFκB pathway genes | 103 |
|-----------|----------------------------------|----------------------------------------------------------------------------------------------------|-----|

Summarized information of whole-exome (WES) and whole-genome sequencing (WGS) studies of selected publications with highlighted novel mutated genes indicated. ccRCC = clear cell renal cell carcinoma, HNSCC = head-and-neck squamous cell carcinoma, HGS-OvCa = high grade serous ovarian carcinoma, HCC = hepatocellular carcinoma, AML = acute myeloid leukemia, MDS = myelodysplastic syndromes, CLL = chronic lymphocytic leukemia, DLBCL = diffuse large B cell lymphoma, MM = multiple myeloma, MSI = microsatellite instable, MSS = microsatellite stable. Predicted or reported consequences of mutations are shown: •hotspot identified, †activating, or likely activating #inactivating, or likely inactivating.

•**hotspot identified**

†**activating, or likely activating**

#**inactivating, or likely inactivating**

**Supplementary FIG. 1 | Recurrent and significantly mutated genes identified from analysis of whole-exome and whole-genome sequencing studies of solid tumours.** Recurrently mutated genes (Recurrent Mut.) and significantly mutated genes (SMGs) demonstrated to possess a higher mutation rate than the calculated background mutation rate (BMR) are shown for whole-exome/whole-genome sequencing (WES/WGS) studies for a number of solid tumour types where available. Approaches to identify SMGs (Sig. approaches) and False Discovery Rate (FDR), a statistical method used to correct for multiple hypothesis testing indicating the expected proportion of “false discoveries”, are shown where available.

**Supplementary FIG. 2 | Recurrent and significantly mutated genes identified from analysis of whole-exome and whole-genome sequencing studies of haematologic malignancies.** Recurrently mutated genes (Recurrent Mut.) and significantly mutated genes (SMGs) demonstrated to possess a higher mutation rate than the calculated background mutation rate (BMR) are shown for whole-exome/whole-genome sequencing (WES/WGS) studies for a number of haematologic malignancies where available. Approaches to identify SMGs (Sig. approaches) and False Discovery Rate (FDR), a statistical method used to correct for multiple hypothesis testing indicating the expected proportion of “false discoveries”, are shown where available.

Type of file: figure

Label: Supplementary Figure 1

Filename: Supplementary Fig 1.pdf

## Glioblastoma (GBM)

Parsons *et al.*, 2008 (REF. 6)

| SMG    | Incidence |
|--------|-----------|
| TP53   | 35%       |
| EGFR   | 14%       |
| PTEN   | 26%       |
| NF1    | 15%       |
| RB1    | 8%        |
| IDH1   | 11%       |
| PIK3CA | 10%       |
| PIK3R1 | 8%        |

### Sig. Approach:

Described in:

Sjblom *et al.*, 2006;  
Parmigiani *et al.*, 2007

## Paediatric GBM

Schwartzentruber *et al.*, 2012 (REF. 118)

### Recurrent Mut.

|        |
|--------|
| TP53   |
| ATRX   |
| DAXX   |
| H3F3A  |
| NF1    |
| IDH1   |
| PDGFRA |

### Sig. Approach:

Knowledge based

## Clear-cell Renal Cell Carcinoma (ccRCC)

Sato *et al.*, 2013 (REF. 55)

| SMG    | Incidence |
|--------|-----------|
| VHL    |           |
| PBRM1  |           |
| BAP1   |           |
| TCEB1  |           |
| SETD2  |           |
| TP53   |           |
| KEAP1  |           |
| TET2   |           |
| MUC4   |           |
| MLLT10 |           |
| MSGN1  |           |
| KRT32  |           |
| M6PR   |           |
| RPL14  |           |
| GRB7   |           |
| TP53   |           |
| CSMD3  |           |
| DNHD1  |           |
| PIK3CA |           |
| NLRP12 |           |
| VMO1   |           |
| OR4C13 |           |
| KCNMA1 |           |
| LMAN2L |           |
| NF1    |           |
| MTOR   |           |
| ZNF536 |           |
| YIPF3  |           |

### Sig. Approach:

Unique to study. (Note: Calculated BMR taking into consideration DNA replication time as described in Hellman *et al.*, 2005; and Stamatoyannopoulos *et al.*, 2009) (FDR<0. 05)

TCGA,2013 (REF. 19)

| SMG     | Incidence |
|---------|-----------|
| VHL     |           |
| PBRM1   |           |
| SETD2   |           |
| KDM5C   |           |
| PTEN    |           |
| BAP1    |           |
| MTOR    |           |
| TP53    |           |
| PIK3CA  |           |
| MSR1    |           |
| TXNIP   |           |
| TCEB1   |           |
| NFE2L2  |           |
| BTNL3   |           |
| SLITRK6 |           |
| RHEB    |           |
| ARID1A  |           |
| NPNT    |           |
| CCNB2   |           |

### Sig. Approach:

Mutsig (FDR<0.1)

## Head and Neck Squamous Cell Carcinoma (HNSCC)

Stransky *et al.*, 2011 (REF. 57)

| SMG    | Incidence |
|--------|-----------|
| TP53   | 47%       |
| CDKN2A | 15%       |
| PRDM9  | 9%        |
| CASP8  | 6%        |
| FAT1   | 5%        |
| CSMD3  | 4%        |

### Sig. Approach:

Frequency

Agrawal *et al.*, 2011 (REF. 56)

| SMG      | Incidence |
|----------|-----------|
| TP53     | 47%       |
| NOTCH1   | 15%       |
| CDKN2A   | 9%        |
| PIK3CA   | 6%        |
| FBXW7    | 5%        |
| HRAS     | 4%        |
| COL22A1  |           |
| NOTCH1   |           |
| PTEN     |           |
| SYNE1    |           |
| HRAS     |           |
| RIMS2    |           |
| USH2A    |           |
| C19orf26 |           |
| MAGEC1   |           |
| CLSTN2   |           |
| KCTD8    |           |
| THSD7A   |           |
| PIK3CA   |           |
| OR4C15   |           |
| ALLC     |           |
| PRB4     |           |
| CDH10    |           |
| GRM8     |           |
| NETO2    |           |
| VN1R4    |           |
| OR5L2    |           |
| PPP1R9A  |           |
| MAFA     |           |
| LRFN5    |           |
| MED1     |           |
| ADCY8    |           |
| ZFHX4    |           |
| MLL2     |           |
| SI       |           |
| ZNF804B  |           |
| LILRB1   |           |
| PKHD1L1  |           |
| CNTNAP2  |           |

### Sig. Approach:

MutSig (FDR<0.1)

## High-grade serous ovarian adenocarcinoma (HGS-OvCa)

TCGA, 2011 (REF. 25)

| SMG    | Incidence |
|--------|-----------|
| TP53   |           |
| BRCA1  |           |
| CSMD3  |           |
| NF1    |           |
| CDK12  |           |
| FAT3   |           |
| GABRA6 |           |
| BRCA2  |           |
| RB1    |           |

### Sig. Approach:

MuSiC and MutSig (FDR <0.15)

## Melanoma

Hodis *et al.*, 2012 (REF. 43)

| SMG      | Incidence |
|----------|-----------|
| BRAF     | 63%       |
| NRAS     | 26%       |
| TP53     | 19%       |
| PTEN     | 12%       |
| P16INK4a | 19%       |
| PPP6C    | 9%        |
| RAC1     | 5%        |
| MAP2K1   | 5%        |
| SNX31    | 7%        |
| TACC1    | 7%        |
| STK19    | 4%        |
| ARID2    | 9%        |

### Sig. Approach:

InVEx (FDR ≤0.2)

Krauthammer *et al.*, 2012 (REF. 62)

| SMG     | Incidence |
|---------|-----------|
| BRAF    |           |
| NRAS    |           |
| DCC     |           |
| TNC     |           |
| TP53    |           |
| PTPRK   |           |
| PPP6C   |           |
| TLR4    |           |
| CD163L1 |           |
| GRM3    |           |
| NPAP1   |           |
| SLC15A2 |           |
| RAC1    |           |
| MAGEC1  |           |
| JAKMIP2 |           |

### Sig. Approach:

Modified protocol described in Ding *et al.*, 2008 (FDR <0.05)

## Lung Cancer

### Non-small-cell lung cancer (NSCLC)

Imielinski *et al.* 2012 (REF. 64)

### Adenocarcinoma (AC)

| SMG      | Incidence |
|----------|-----------|
| TP53     |           |
| KRAS     |           |
| EGFR     |           |
| STK11    |           |
| KEAP1    |           |
| ATM      |           |
| NF1      |           |
| SMARCA4  |           |
| ARID1A   |           |
| BRAF     |           |
| RBM10    |           |
| SETD2    |           |
| PIK3CA   |           |
| CBL      |           |
| FBXW7    |           |
| PPP2R1A  |           |
| RB1      |           |
| SMAD4    |           |
| CTNNB1   |           |
| U2AF1    |           |
| KIAA0427 |           |
| PTEN     |           |
| BRD3     |           |
| FGFR3    |           |
| GOPC     |           |

### Sig. Approach:

InVEx (FDR<0.25)

### Small-cell lung cancer (SCLC)

TCGA, 2012 (REF. 26)

### Squamous cell carcinoma (SCC)

| SMG    | Incidence |
|--------|-----------|
| TP53   | 81%       |
| CDKN2A | 15%       |
| PTEN   | 8%        |
| PIK3CA | 16%       |
| KEAP1  | 12%       |
| MLL2   | 20%       |
| HLA-A  | 3%        |
| NFE2L2 | 15%       |
| NOTCH1 | 8%        |
| RB1    | 7%        |

### Sig. Approach:

MutSig (FDR<0.1)

Rudin *et al.*, 2012 (REF. 65)

### SMG

|           |
|-----------|
| TP53      |
| COL22A1   |
| RB1       |
| ELAVL2    |
| RASSF8    |
| CNTNAP2   |
| BCLAF1    |
| GRM8      |
| KIF21A    |
| GRIK3     |
| C17orf108 |
| RUNX1T1   |
| PLSCR4    |
| CDYL      |
| RIMS2     |
| ZDBF2     |
| KHSRP     |
| SATB2     |
| COL4A2    |
| DIP2C     |
| TMEM132D  |
| ADCY1     |

### Sig. Approach:

Described in Kan *et al.*, 2010 (FDR ≤0. 1)

## Prostate Cancer

Barbieri *et al.*, 2012 (REF. 68)

| SMG      | Incidence |
|----------|-----------|
| SPOP     | 13%       |
| TP53     | 6%        |
| PTEN     | 4%        |
| FOXA1    | 4%        |
| CDKN1B   | 3%        |
| ZNF595   | 4%        |
| THSD7B   | 5%        |
| MED12    | 5%        |
| NIPA2    | 3%        |
| PIK3CA   | 4%        |
| C14orf49 | 5%        |
| SCN11A   | 5%        |

### Sig. Approach:

MutSig (FDR<0.1)

Grasso *et al.* 2012 (REF. 69)

| SMG   | Incidence |
|-------|-----------|
| TP53  | 40%       |
| AR    | 9%        |
| ZFHX3 | 14%       |
| RB1   | 10%       |
| PTEN  | 10%       |
| APC   | 10%       |
| MLL2  | 9%        |
| OR5L1 | 3%        |
| CDK12 | 5%        |

### Sig. Approach:

MutSig (FDR ≤ 0.1)

## Colorectal Cancer

TCGA, 2012 (REF. 22)

### Hypermutated

| SMG    | Incidence |
|--------|-----------|
| ACVR2A | 63%       |
| APC    | 51%       |
| TGFBR2 | 51%       |
| BRAF   | 46%       |
| MSH3   | 40%       |
| MSH6   | 40%       |
| MYO1B  | 31%       |
| TCF7L2 | 31%       |
| CASP8  | 29%       |
| CDC27  | 29%       |
| FZD3   | 29%       |
| MIER3  | 29%       |
| TCERG1 | 29%       |
| MAP7   | 26%       |
| PTPN12 | 26%       |

### Sig. Approach:

MutSig (FDR<0.1) and manual curation of expressed genes

### Non-hypermutated

| SMG      | Incidence |
|----------|-----------|
| APC      | 81%       |
| TP53     | 60%       |
| KRAS     | 43%       |
| TTN      | 31%       |
| PIK3CA   | 18%       |
| FBXW7    | 11%       |
| SMAD4    | 10%       |
| NRAS     | 9%        |
| TCF7L2   | 9%        |
| FAM123B  | 7%        |
| SMAD2    | 6%        |
| CTNNB1   | 5%        |
| KIAA1804 | 4%        |
| SOX9     | 4%        |
| ACVR1B   | 4%        |
| GPC6     | 4%        |
| EDNRB    | 3%        |

### Sig. Approach:

MutSig (FDR<0.1) and manual curation of expressed genes

### MSS Samples

| SMG       | Incidence |
|-----------|-----------|
| KRAS      | 55%       |
| TP53      | 53%       |
| APC       | 26%       |
| PIK3CA    | 26%       |
| SMAD4     | 25%       |
| FBXW7     | 11%       |
| CSMD1     | 19%       |
| NRXN1     | 15%       |
| TCF7L2    | 8%        |
| DNAH5     | 15%       |
| MRV11     | 8%        |
| ZNF208    | 8%        |
| TRPS1     | 9%        |
| OR10A7    | 6%        |
| DMD       | 9%        |
| KIF2B     | 8%        |
| ATM       | 8%        |
| FAM5C     | 8%        |
| EVC2      | 9%        |
| OR2W3     | 6%        |
| IL13RA1   | 6%        |
| TMPRSS11A | 6%        |
| C1orf170  | 4%        |

### Sig. Approach:

Described in Kan *et al.*, 2010 (FDR<0. 0.05)

## Gastric Cancer

Zang *et al.*, 2011 (REF. 35)

### SMG

|         |
|---------|
| TP53    |
| DBR1    |
| RIT2    |
| CCNL1   |
| APC     |
| ATF5    |
| PKHD1   |
| ADAM18  |
| HTR1E   |
| ARID1A  |
| NRXN1   |
| NFAT5   |
| PPP1R1B |
| ZNF193  |
| CERK    |
| OR4C46  |
| OR4C15  |
| PIK3CA  |

### Sig. Approach:

MuSiC and described in Greenman *et al.*, 2006 (FDR<0.2)

Wang *et al.*, 2011 (REF. 34)

### SMG

|         |
|---------|
| TP53    |
| PTEN    |
| ARID1A  |
| RPL22   |
| TTK     |
| FMN2    |
| SPRR2B  |
| PTN     |
| ACVR2A  |
| PMS2L3  |
| DNAH7   |
| TTN     |
| FSCB    |
| CTNNB1  |
| SEMA3E  |
| MCHR1   |
| SPANXN2 |
| METTL3  |
| EIF3A   |
| EPB41L3 |

### Sig. Approach:

Described in Kan *et al.*, 2010 (FDR ≤ 0.2)

## Breast Cancer

Ellis *et al.*, 2012 (REF. 73)

### SMG

|         |
|---------|
| MAP3K1  |
| PIK3CA  |
| TP53    |
| GATA3   |
| CDH1    |
| CDKN2A  |
| MAP2K4  |
| MAP3K1  |
| NCOR1   |
| PTEN    |
| MLL3    |
| AKT1    |
| ARID1B  |
| CASP8   |
| NF1     |
| RB1     |
| TBX3    |
| MAP3K13 |
| AKT2    |
| APC     |
| ARID2   |
| ASXL1   |
| BAP1    |
| BRCA1   |
| BRCA2   |
| CDKN1B  |
| MLL2    |
| SETD2   |
| SMAD4   |
| SMARCD1 |
| STK11   |

### Sig. Approach:

MuSiC (FDR<0.26)

Stephens *et al.*, 2012 (REF. 31)

### Recurrent Mut.

|         |
|---------|
| TP53    |
| PIK3CA  |
| GATA3   |
| CDH1    |
| CDKN2A  |
| MAP2K4  |
| MAP3K1  |
| NCOR1   |
| PTEN    |
| MLL3    |
| AKT1    |
| ARID1B  |
| SF3B1   |
| ARID1A  |
| CASP8   |
| NF1     |
| RB1     |
| TBX3    |
| MAP3K13 |
| AKT2    |
| APC     |
| ARID2   |
| ASXL1   |
| BAP1    |
| BRCA1   |
| BRCA2   |
| CDKN1B  |
| MLL2    |
| SETD2   |
| SMAD4   |
| SMARCD1 |
| STK11   |

### Sig. Approach:

Described in Greenman *et al.*, 2006 and prior biological knowledge

TCGA, 2012 (REF. 23)

### SMG

|         |
|---------|
| TP53    |
| PIK3CA  |
| GATA3   |
| MAP3K1  |
| CDH1    |
| MAP2K4  |
| RUNX1   |
| PTEN    |
| TBX3    |
| PIK3R1  |
| AKT1    |
| CBBF    |
| TBL1XR1 |
| NCOR1   |
| CASF8   |
| CTCF    |
| ZFP36L1 |
| GPS2    |
| SF3B1   |
| CDKN1B  |
| USH2A   |
| RPGR    |
| RB1     |
| AFF2    |
| NF1     |
| PTPN22  |

Type of file: figure

Label: Supplementary Figure 2

Filename: Supplementary Fig 2.pdf

## Acute Myeloid Leukemia (AML)

TCGA, 2013 (REF. 33)

### SMG

DNMT3A  
NPM1  
FLT3  
TET2  
RUNX1  
IDH2  
IDH1  
CEBPA  
TP53  
NRAS  
WT1  
KIT  
PTPN11  
KRAS  
U2AF1  
SMC1A  
SMC3  
PHF6  
FAM5C  
STAG2  
RAD21  
EZH2  
HNRNPK  
**Sig. Approach:**  
MuSiC (FDR < 0.05)

## Myelodysplastic Syndromes (MDS)

Yoshida *et al.*, 2011 (REF. 89)

MDS/CMML/AML-MRC

### Recurrent Mut.

TET2  
U2AF1  
ZRSR2  
NRAS  
SRSF2  
ASXL1  
BCOR  
DNMT3A  
EZH2  
KRAS  
RUNX1  
TP53  
ATRAX  
CBL  
FLT3  
IDH1  
IDH2  
SF3B1  
STAG2

### Sig. Approach:

Knowledge based

## Chronic Lymphocytic Leukemia (CLL)

Wang *et al.*, 2011 (REF. 92)

### SMG Incidence

TP53 15%  
SF3B1 15%  
MYD88 10%  
ATM 9%  
FBXW7 4%  
NOTCH1 4%  
ZMYM3 4%  
DDX3X 3%  
MAPK1 3%

### Sig. Approach:

MutSig (FDR≤0.1)

Puente *et al.*, 2011 (ICGC) (REF. 29)

IGHV: unmutated mutated

| Recurrent Mut. | Incidence | Incidence |
|----------------|-----------|-----------|
| NOTCH1         | 20.4%     | 7%        |
| MYD88          | 0.8%      | 5.6%      |
| XPO1           | 4.6%      | 0%        |
| KLHL6          | 0%        | 4.5%      |

### Sig. Approach:

Frequency

Quesada *et al.*, 2012 (ICGC) (REF. 30)

IGHV: unmutated mutated

| Recurrent Mut. | Incidence | Incidence |
|----------------|-----------|-----------|
| NOTCH1         | 2.8%      | 10.1%     |
| SF3B1          | 7.9%      | 20.5%     |
| POT1           | 0%        | 11.1%     |
| CHD2           | 8.3%      | 0%        |
| LRP1B          | 5.0%      | 4.4%      |

### Sig. Approach:

Frequency

Fabbri *et al.*, 2011 (REF. 94)

### Recurrent Mut. Incidence

NOTCH1 15%  
TP53 8%  
PLEKHG5 4%  
TGM7 4%  
BIRC3 4%

### Sig. Approach:

Frequency

## Diffuse Large B Cell Lymphoma (DLBCL)

Lohr *et al.*, 2012 (REF. 99)

| SMG      | Incidence |
|----------|-----------|
| PCLO     | 35%       |
| PIM1     | 31%       |
| MLL2     | 29%       |
| TP53     | 24%       |
| TNFRSF14 | 22%       |
| GNA13    | 20%       |
| CARD11   | 20%       |
| MEF2B    | 18%       |
| CD79B    | 16%       |
| BTG1     | 16%       |
| HIST1H1C | 14%       |
| EZH2     | 14%       |
| TMSL3    | 12%       |
| CD58     | 10%       |

### Sig. Approach:

MutSig (FDR≤0.1)

Pasqualucci *et al.*, 2011 (REF. 101)

| Recurrent Mut. | Recurrent Mut. |
|----------------|----------------|
| MLL2           | TMEM30A        |
| CREBBP         | EP300          |
| TP53           | DPYD           |
| MYOM2          | DSC3           |
| TNFAIP3        | KLF2           |
| PIM1           | MED12L         |
| CD36           | MTMR8          |
| B2M            | PMS1           |
| CD79B          | TSC22D1        |
| PRDM1          | OFD1           |
| CARD11         | TRAF3          |
| BCL2           | BCL2L10        |
| MEF2B          | BRSK1          |
| MYD88          | CAMTA1         |
| ANKLE2         | CYTSB          |
| KDM2B          | DUSP9          |
| HNF1B          | FBXO31         |
| MYC            | GRB2           |
| CD58           | HMGB1          |
| EZH2           | MYO1G          |
| ADAMTSL3       | PPP2R5A        |
| AKAP8          | RASGEF1A       |
| C12orf35       | RGAG1          |
| CCND3          | SERPINA1       |
| DCHS1          | SMARCA1        |
| DUSP27         | ZNF521         |
| MAGEC3         | ZWILCH         |
| TLL2           | NOTCH1         |

### Sig. Approach:

Frequency

## Paediatric Acute Lymphoblastic Leukemia (ALL)

Zhang *et al.*, 2012 (REF. 97)

ETP ALL Non-ETP ALL

| Recurrent Mut. | Incidence | Recurrent Mut. | Incidence |
|----------------|-----------|----------------|-----------|
| ETV6           | 33%       | CDKN2A         | 81%       |
| WT1            | 28%       | NOTCH1         | 43%       |
| CDKN2A         | 25%       | PTEN           | 26%       |
| PHF6           | 25%       | PHF6           | 21%       |
| DNM2           | 13%       | FBXW7          | 14%       |
| NRAS           | 17%       | WT1            | 12%       |
| SUZ12          | 11%       | EZH2           | 12%       |
| EZH2           | 16%       | ETV6           | 10%       |
| NOTCH1         | 16%       | DNM2           | 10%       |
| RUNX1          | 16%       | NRAS           | 10%       |
| FLT3           | 14%       | CTCF           | 10%       |
| EED            | 13%       | EED            | 7%        |
| IKZF1          | 13%       | BCL11B         | 7%        |
| JAK3           | 11%       | ECT2L          | 7%        |
| NF1            | 11%       | RUNX1          | 5%        |
| GATA3          | 9%        | NF1            | 5%        |
| PTEN           | 9%        | IL7R           | 5%        |
| CTCF           | 8%        | RELN           | 5%        |
| ECT2L          | 8%        | SUZ12          | 2%        |
| IL7R           | 8%        | IKZF1          | 2%        |
| JAK1           | 8%        | JAK1           | 2%        |
| SETD2          | 8%        |                |           |
| RELN           | 6%        |                |           |
| SH2B3          | 6%        |                |           |
| BCL11B         | 5%        |                |           |
| EP300          | 5%        |                |           |
| FBXW7          | 5%        |                |           |
| PTPN11         | 5%        |                |           |
| KRAS           | 3%        |                |           |
| BRAF           | 2%        |                |           |
| DCLRE1C        | 2%        |                |           |
| HIST1H1B       | 2%        |                |           |
| HNRNPA1        | 2%        |                |           |
| HNRNPR         | 2%        |                |           |

### Sig. Approach:

Frequency

## Multiple Myeloma (MM)

Chapman *et al.*, 2011 (REF. 103)

| SMG     | Incidence |
|---------|-----------|
| KRAS    | 26%       |
| NRAS    | 24%       |
| FAM46C  | 13%       |
| DIS3    | 11%       |
| TP53    | 8%        |
| CCND1   | 5%        |
| PNRC1   | 5%        |
| ALOX12B | 8%        |
| HLA-A   | 5%        |
| MAGED1  | 5%        |

### Sig. Approach:

MutSig (FDR≤0.1)
